# Supplementary material
Source: PubMed Central journal article supplement (PMC1458768)
Supplement: pnas_0508269103_1.pdf [file pnas_0508269103_1.pdf]

## Supporting Text

**Estimation of the Bending Energy Penalty.** We estimate the bending energy of a single actin filament as  $\delta E = \frac{1}{2} \frac{L\kappa}{r^2} = \frac{1}{2} \frac{Ll_p k_B T}{r^2}$ , where  $\kappa$  is a bending constant,  $r$  the radius of curvature,  $L$  is the actin filament length, and  $l_p$  is the actin filament persistence length,  $l_p \sim 17$   $\mu\text{m}$ . From the length of the filaments (we estimate  $L \sim 1$   $\mu\text{m}$  measured from the network periphery to the onset of a bundle, see ref. 1) and their curvature ( $\sim 1$   $\mu\text{m}^{-1}$  or less, see ref. 1), we estimate a bending energy penalty of  $\delta E \approx 8k_B T$ .

1. Svitkina, T. M., Bulanova, E. A., Chaga, O. Y., Vignjevic, D. M., Kojima, S., Vasiliev, J. M. & Borisy, G. G. (2003) *J. Cell Biol.* **160**, 409-421.
